# Supplementary material
Source: MDPI journal article supplement (https://www.mdpi.com/2076-3263/13/9/275)
Supplement: s1 [file s1]

## Supplementary materials

Table S1. ChRM directions measured by PCA method for the previous Spid samples (Rahimi, 2017).

| <i>Id</i>    | <i>Statistics</i> | <i>Range</i> | <i>n</i> | <i>Dg</i> | <i>Ig</i> | <i>MAD</i> |
|--------------|-------------------|--------------|----------|-----------|-----------|------------|
| <i>S1A4</i>  | DirOKir           | N004-N080    | 17       | 209.2     | -62.6     | 1.1        |
| <i>S1B2</i>  | DirOKir           | N004-N080    | 17       | 181.9     | -59.6     | 0.8        |
| <i>S2A2</i>  | DirOKir           | N004-N080    | 17       | 107.7     | -72.4     | 2.4        |
| <i>S2B2</i>  | DirOKir           | N004-N080    | 17       | 90.7      | -67.4     | 1.4        |
| <i>S3A3</i>  | DirOKir           | N004-N080    | 17       | 102.2     | -86.5     | 1.6        |
| <i>S3B2</i>  | DirOKir           | N004-N080    | 17       | 126.9     | -60.4     | 0.9        |
| <i>S4A2</i>  | DirOKir           | N004-N080    | 17       | 245.6     | -73.6     | 0.9        |
| <i>S4B4</i>  | DirOKir           | N004-N080    | 17       | 204.7     | -29.8     | 4.2        |
| <i>S5A3</i>  | DirOKir           | N004-N080    | 17       | 212.9     | -59.7     | 2.6        |
| <i>S5B2</i>  | DirOKir           | N004-N080    | 17       | 253.5     | -59       | 2.6        |
| <i>S6A2</i>  | DirOKir           | N004-N080    | 17       | 187.8     | -76.8     | 1.5        |
| <i>S6B2</i>  | DirOKir           | N004-N080    | 17       | 88.5      | -72.3     | 1          |
| <i>S7A2</i>  | DirOKir           | N004-N080    | 17       | 143.9     | -79.9     | 1.4        |
| <i>S7B2</i>  | DirOKir           | N008-N080    | 16       | 96.8      | -76.2     | 1.9        |
| <i>S8A4</i>  | DirOKir           | N004-N080    | 17       | 39.8      | -83.1     | 2.6        |
| <i>S8B2</i>  | DirOKir           | N008-N080    | 16       | 69.4      | -77.2     | 0.4        |
| <i>S9A4</i>  | DirOKir           | N008-N080    | 16       | 122.8     | -74.7     | 1.9        |
| <i>S9B3</i>  | DirOKir           | N012-N080    | 15       | 220       | -76.7     | 1.7        |
| <i>S10A2</i> | DirOKir           | N016-N080    | 14       | 229.4     | -77.2     | 0.5        |
| <i>S10B3</i> | DirOKir           | N012-N080    | 15       | 68.1      | -67.4     | 2.2        |
| <i>S11A3</i> | DirOKir           | N008-N080    | 16       | 253.1     | -73.5     | 1.2        |
| <i>S11B2</i> | DirOKir           | N004-N080    | 17       | 317.2     | -87.5     | 1.8        |
| <i>S12A2</i> | DirOKir           | N016-N080    | 14       | 188.5     | -83.7     | 0.3        |
| <i>S12B2</i> | DirOKir           | N016-N080    | 14       | 139.6     | -79.6     | 0.8        |
| <i>S13A4</i> | DirOKir           | N008-N080    | 16       | 121.3     | -61.4     | 4.7        |
| <i>S13B2</i> | DirOKir           | N008-N080    | 16       | 270.6     | -68.5     | 1          |
| <i>S14A2</i> | DirOKir           | N004-N080    | 17       | 243.7     | -68       | 2.3        |
| <i>S14B2</i> | DirOKir           | N004-N080    | 17       | 236.1     | -63.6     | 1.1        |
| <i>S15A2</i> | DirOKir           | N008-N080    | 16       | 263.2     | -78.9     | 3.9        |
| <i>S15B2</i> | DirOKir           | N016-N080    | 14       | 24.5      | -73.7     | 0.8        |
| <i>S16A2</i> | DirOKir           | N008-N080    | 16       | 46.6      | -76.8     | 1.3        |
| <i>S16B2</i> | DirOKir           | N012-N080    | 15       | 67.4      | -71.7     | 0.9        |
| <i>S17A2</i> | DirOKir           | N016-N080    | 14       | 42.2      | -79       | 7.9        |
| <i>S17B3</i> | DirOKir           | N004-N080    | 17       | 17.3      | -58.2     | 3.8        |
| <i>S18A2</i> | DirOKir           | N008-N080    | 16       | 50.9      | -88.8     | 1.5        |
| <i>S18B2</i> | DirOKir           | N008-N075    | 15       | 17.5      | -80.3     | 0.9        |
| <i>S19A3</i> | DirOKir           | N008-N080    | 16       | 85.8      | -77.5     | 1.6        |
| <i>S19B4</i> | DirOKir           | N004-N080    | 17       | 27.8      | -86.1     | 1.9        |
| <i>S20A2</i> | DirOKir           | N008-N080    | 16       | 308.9     | -81.3     | 0.8        |
| <i>S20B2</i> | DirOKir           | N004-N080    | 17       | 137       | 23.9      | 1.6        |

Table S2. ChRM directions measured by PCA method for Spid samples (this study).

| <b>Id</b>    | <b>Statistics</b> | <b>Range</b> | <b>n</b> | <b>Dg</b> | <b>Ig</b> | <b>MAD</b> |
|--------------|-------------------|--------------|----------|-----------|-----------|------------|
| <i>SA1-2</i> | Dir Kir           | N450-N620    | 6        | 246.7     | -57.7     | 8.5        |
| <i>SA6-1</i> | Dir Kir           | N450-N660    | 7        | 231.6     | -58.2     | 6.3        |
| <i>SB1</i>   | DirOKir           | N310-N590    | 8        | 244       | -38.4     | 2.8        |
| <i>SB1</i>   | DirOKir           | N250-N640    | 12       | 244.4     | -38.1     | 2.4        |
| <i>SB1</i>   | Dir Kir           | N310-N450    | 4        | 234.3     | -29.7     | 2.8        |
| <i>SB1</i>   | DirOKir           | N500-N590    | 4        | 246.3     | -39.3     | 2.9        |
| <i>SB10</i>  | Dir Kir           | N250-N400    | 5        | 39.4      | -59.1     | 6.4        |
| <i>SB10b</i> | Dir Kir           | N450-N590    | 5        | 31.3      | -55.1     | 5.2        |
| <i>SB2</i>   | Dir Kir           | N120-N590    | 14       | 11.7      | 61.7      | 11.1       |
| <i>SB2</i>   | Dir Kir           | N240-N480    | 8        | 41.5      | 73.8      | 12.2       |
| <i>SB3</i>   | Dir Kir           | N250-N590    | 10       | 342.4     | 1.7       | 4.8        |
| <i>SB3</i>   | DirOKir           | N250-N590    | 10       | 336.5     | 1.3       | 3.6        |
| <i>SB5</i>   | Dir Kir           | N280-N590    | 9        | 262.4     | -24.9     | 7.4        |
| <i>SB5</i>   | Dir Kir           | N280-N450    | 5        | 256.2     | -29.7     | 1.8        |
| <i>SB5</i>   | Dir Kir           | N500-N590    | 5        | 280.5     | 3         | 10.8       |
| <i>SB5</i>   | Dir Kir           | N310-N450    | 4        | 257       | -28.5     | 2.1        |
| <i>SB6</i>   | Dir Kir           | N310-N590    | 8        | 304       | -44.5     | 3.1        |
| <i>SB7</i>   | Dir Kir           | N250-N530    | 8        | 276.7     | 6.6       | 22.2       |
| <i>SB7</i>   | Dir Kir           | N450-N590    | 5        | 169.5     | -68.8     | 1.5        |
| <i>SB7-1</i> | Dir Kir           | N014-N080    | 19       | 314.9     | -61.4     | 3.3        |
| <i>SB7-1</i> | DirOKir           | N085-N100    | 4        | 174.9     | -24.3     | 4          |
| <i>SB8</i>   | Dir Kir           | N160-N680    | 17       | 297.7     | -53.1     | 6.7        |
| <i>SB8b</i>  | DirOKir           | N660-N680    | 3        | 234.4     | -43.4     | 2.1        |
| <i>SC1</i>   | Dir Kir           | N310-N450    | 4        | 9.5       | -74.3     | 10.3       |
| <i>SC1b</i>  | Dir Kir           | N500-N590    | 4        | 294.3     | -63.2     | 4.4        |
| <i>SC3</i>   | Dir Kir           | N120-N590    | 13       | 342       | 65.6      | 3.2        |
| <i>SC4</i>   | DirOKir           | N250-N660    | 13       | 171.3     | -3.8      | 3.2        |
| <i>SC4b</i>  | Dir Kir           | N250-N660    | 13       | 171.5     | -1.7      | 4.1        |
| <i>SC5a</i>  | Dir Kir           | N250-N400    | 5        | 249.8     | -13       | 24.7       |
| <i>SC5b</i>  | Dir Kir           | N450-N640    | 7        | 227.7     | -31.9     | 4.7        |
| <i>SC6</i>   | Dir Kir           | N250-N660    | 11       | 157.3     | -39.3     | 9          |
| <i>SC7</i>   | Dir Kir           | N240-N590    | 10       | 194.5     | -38       | 2.9        |
| <i>SC8a</i>  | DirOKir           | N250-N660    | 13       | 176.3     | -35.3     | 3.5        |
| <i>SD1</i>   | Dir Kir           | N200-N590    | 11       | 269.2     | -63.7     | 1.5        |
| <i>SD2</i>   | Dir Kir           | N200-N360    | 5        | 58.3      | -63.6     | 1.8        |
| <i>SD3</i>   | Dir Kir           | N450-N660    | 8        | 300.7     | -76.1     | 3.5        |
| <i>SD3-1</i> | Dir Kir           | N020-N065    | 12       | 27        | -37.1     | 3.1        |
| <i>SD3-1</i> | DirOKir           | N080-N100    | 5        | 166.2     | -41       | 1.6        |
| <i>SD3a</i>  | Dir Kir           | N250-N400    | 5        | 358.5     | -81.8     | 4.4        |
| <i>SE1</i>   | Dir Kir           | N280-N590    | 9        | 189.4     | -71.9     | 2.6        |
| <i>SE2</i>   | Dir Kir           | N200-N590    | 11       | 104.3     | -73.3     | 3.8        |
| <i>SE2-1</i> | Dir Kir           | N024-N065    | 11       | 39.2      | -45.8     | 4          |
| <i>SE2-1</i> | DirOKir           | N080-N100    | 5        | 80        | -43.2     | 0.9        |
| <i>SF1</i>   | Dir Kir           | N240-N620    | 10       | 237.4     | 22.8      | 2.1        |
| <i>SF1-1</i> | Dir Kir           | N026-N060    | 9        | 2.5       | -39.7     | 2.1        |
| <i>SF1-1</i> | DirOKir           | N085-N100    | 4        | 37.9      | -30.3     | 2.3        |
| <i>SF2</i>   | Dir Kir           | N200-N590    | 11       | 248.9     | -65.7     | 5.7        |
| <i>SG1</i>   | Dir Kir           | N340-N560    | 6        | 182.6     | -53.2     | 6.7        |
| <i>SG2</i>   | Dir Kir           | N400-N590    | 5        | 1.6       | -56.6     | 1.3        |
| <i>SG3a</i>  | Dir Kir           | N250-N560    | 10       | 82.4      | 35.6      | 8.1        |
| <i>SG4</i>   | Dir Kir           | N240-N360    | 4        | 150.3     | -36.1     | 1.3        |
| <i>SG5</i>   | Dir Kir           | N280-N590    | 8        | 8.7       | -73.7     | 2.6        |
| <i>SG5-1</i> | Dir Kir           | N045-N100    | 12       | 216.3     | -41.9     | 5.7        |
| <i>SG6a</i>  | Dir Kir           | N250-N640    | 12       | 118.1     | -65.4     | 3.7        |
| <i>SG6b</i>  | DirOKir           | N250-N640    | 12       | 116.4     | -64.8     | 2.2        |

Table S3. ChRM directions measured by PCA method for Zaghar samples

| <b>Id</b> | <b>Statistics</b> | <b>Range</b> | <b>n</b> | <b>Dg</b> | <b>Ig</b> | <b>MAD</b> |
|-----------|-------------------|--------------|----------|-----------|-----------|------------|
| ZA1       | DirOKir           | N250-N450    | 6        | 45.8      | 18.3      | 9.6        |
| ZA1       | Dir Kir           | N250-N450    | 6        | 39.5      | 62.2      | 33.3       |
| ZA2       | Dir Kir           | N280-N560    | 8        | 182.3     | -54.1     | 5.3        |
| ZA4       | Dir Kir           | N250-N400    | 5        | 216.9     | -63.2     | 3.8        |
| ZA4       | Dir Kir           | N250-N340    | 4        | 218.5     | -64.2     | 5.5        |
| ZA4b      | Dir Kir           | N400-N530    | 4        | 270.4     | -68.4     | 5.3        |
| ZA4b      | DirOKir           | N400-N530    | 4        | 249.4     | -67.8     | 4.5        |
| ZA5       | Dir Kir           | N280-N560    | 5        | 99.5      | 84.3      | 5.3        |
| ZA6       | Dir Kir           | N280-N530    | 7        | 20.1      | -72.9     | 3.8        |
| ZA6       | Dir Kir           | N250-N530    | 8        | 17.1      | -73.6     | 3.4        |
| ZB1a      | Dir Kir           | N004-N035    | 8        | 134       | -16.8     | 6.2        |
| ZB2       | Dir Kir           | N250-N340    | 4        | 136.5     | -65.8     | 3.3        |
| ZB2       | DirOKir           | N250-N590    | 10       | 140.5     | -65.9     | 2.4        |
| ZB3       | Dir Kir           | N200-N360    | 5        | 214       | -25       | 2.9        |
| ZB5       | Dir Kir           | N750-N950    | 5        | 257.7     | -33.1     | 12.8       |
| ZB5a      | Dir Kir           | N000-N240    | 7        | 176.9     | -75.4     | 9.3        |
| ZB5a      | Dir Kir           | N450-N700    | 4        | 84.1      | -51.1     | 21.1       |
| ZB6       | Dir Kir           | N200-N360    | 5        | 268.9     | -70.6     | 1.4        |
| ZC1       | Dir Kir           | N250-N530    | 8        | 291.4     | -35.3     | 7.6        |
| ZC1       | DirOKir           | N250-N450    | 6        | 292.6     | -34       | 5          |
| ZC2       | Dir Kir           | N240-N360    | 4        | 253       | -50.5     | 1.3        |
| ZC3       | Dir Kir           | N250-N340    | 4        | 167.3     | 22.6      | 9.7        |
| ZC4       | Dir Kir           | N250-N530    | 7        | 256.3     | -38.1     | 6.7        |
| ZC4       | Dir Kir           | N250-N450    | 6        | 252.8     | -36.5     | 10.8       |
| ZC4b      | DirOKir           | N250-N450    | 5        | 259.4     | -38.4     | 5.3        |
| ZC5a      | DirOKir           | N040-N700    | 15       | 310.8     | -39.8     | 4.4        |
| ZC7       | Dir Kir           | N200-N360    | 5        | 305.6     | -39.5     | 2.5        |
| ZD1       | Dir Kir           | N200-N520    | 8        | 54.4      | -81       | 5.4        |
| ZD2a      | DirOKir           | N250-N660    | 13       | 143.6     | -62.1     | 1.7        |
| ZD2b      | Dir Kir           | N250-N660    | 13       | 143.1     | -62.5     | 2.6        |
| ZD2b      | DirOKir           | N250-N660    | 13       | 105.7     | -54.5     | 2.4        |
| ZD3a      | Dir Kir           | N250-N400    | 5        | 352.9     | -58.7     | 3.3        |
| ZD3b      | Dir Kir           | N450-N660    | 8        | 353       | -69.4     | 4.5        |
| ZD4a      | DirOKir           | N250-N660    | 13       | 147.2     | -73.8     | 3          |
| ZD4b      | Dir Kir           | N250-N660    | 13       | 146.2     | -75.1     | 4.4        |
| ZD5b      | Dir Kir           | N400-N660    | 8        | 296.3     | -65.1     | 4.9        |
| ZD5c      | DirOKir           | N400-N660    | 8        | 294.4     | -65.4     | 3.3        |
| ZD5q      | Dir Kir           | N250-N340    | 4        | 286.8     | -72.4     | 9          |
| ZD6       | Dir Kir           | N240-N620    | 11       | 165.7     | -76.2     | 5.5        |
| ZD7a      | Dir Kir           | N250-N400    | 5        | 94.3      | -57.7     | 4.1        |
| ZD7b      | DirOKir           | N450-N620    | 6        | 131.5     | -58.1     | 2.9        |
| ZD8a      | Dir Kir           | N250-N530    | 8        | 289.7     | -83.4     | 2.9        |
| ZD8b      | Dir Kir           | N560-N640    | 4        | 230       | -79.8     | 2          |
| ZE1a      | Dir Kir           | N250-N560    | 8        | 199       | -79.3     | 7.5        |
| ZE1b      | DirOKir           | N250-N560    | 8        | 174.1     | -75.2     | 6.3        |
| ZE2a      | Dir Kir           | N310-N450    | 4        | 87.7      | -72.7     | 7          |
| ZE3       | Dir Kir           | N250-N590    | 10       | 67        | -73.5     | 4          |
| ZE3       | Dir Kir           | N250-N560    | 9        | 67        | -72       | 3.5        |
| ZE3       | Dir Kir           | N280-N560    | 8        | 63        | -72       | 3.7        |
| ZE3a      | Dir Kir           | N250-N450    | 6        | 77        | -70       | 3.2        |
| ZE3B      | Dir Kir           | N500-N590    | 4        | 68.7      | -80       | 5.1        |
| ZE4       | Dir Kir           | N250-N530    | 8        | 163.1     | -74.9     | 9.5        |
| ZE4       | Dir Kir           | N500-N590    | 4        | 63.9      | -74.2     | 4.1        |
| ZE4b      | DirOKir           | N500-N530    | 2        | 81        | -73.7     | 1.2        |
| ZE5       | Dir Kir           | N250-N450    | 6        | 294       | -61.8     | 4.6        |
| ZE5b      | Dir Kir           | N560-N660    | 6        | 158       | 71.2      | 4.6        |

Table S3. Continued.

| <b>Id</b>   | <b>Statistics</b> | <b>Range</b> | <b>n</b> | <b>Dg</b> | <b>Ig</b> | <b>MAD</b> |
|-------------|-------------------|--------------|----------|-----------|-----------|------------|
| <i>ZE6</i>  | Dir Kir           | N160-N590    | 12       | 121.7     | -73.4     | 3.4        |
| <i>ZE6a</i> | Dir Kir           | N160-N360    | 6        | 128.7     | -70.1     | 5          |
| <i>ZE6b</i> | DirOKir           | N400-N640    | 9        | 104.3     | -73.8     | 2.7        |
| <i>ZE7</i>  | Dir Kir           | N310-N560    | 7        | 44.7      | -49.4     | 3.6        |
| <i>ZE7a</i> | DirOKir           | N250-N660    | 14       | 45.6      | -48.8     | 3.8        |
| <i>ZE7a</i> | DirOKir           | N250-N560    | 9        | 46.1      | -48       | 1.6        |
| <i>ZE7b</i> | Dir Kir           | N250-N660    | 14       | 44.8      | -50.3     | 3.6        |
| <i>ZE7b</i> | Dir Kir           | N250-N560    | 9        | 47        | -48.1     | 3.2        |
| <i>ZE8</i>  | Dir Kir           | N240-N560    | 9        | 277.9     | -26.9     | 9.7        |
| <i>ZE8a</i> | Dir Kir           | N120-N320    | 6        | 290.6     | -53.5     | 8.4        |
| <i>ZE9</i>  | Dir Kir           | N250-N310    | 3        | 299.1     | -60.8     | 9.2        |
| <i>ZE9a</i> | DirOKir           | N250-N590    | 10       | 248.9     | -66       | 2.7        |
| <i>ZF1</i>  | Dir Kir           | N250-N310    | 3        | 309.4     | -56.2     | 4.7        |
| <i>ZF10</i> | Dir Kir           | N340-N500    | 4        | 317.2     | -63.2     | 8.3        |
| <i>ZF1a</i> | DirOKir           | N340-N530    | 5        | 321.1     | -58.8     | 3          |
| <i>ZF1b</i> | Dir Kir           | N340-N530    | 5        | 329.5     | -55.9     | 5.5        |
| <i>ZF2</i>  | Dir Kir           | N250-N530    | 8        | 325       | -81.2     | 3.7        |
| <i>ZF3</i>  | Dir Kir           | N200-N520    | 9        | 85.1      | -54.4     | 8.3        |
| <i>ZF4</i>  | Dir Kir           | N20-N310     | 4        | 57.5      | -53.5     | 4          |
| <i>ZF4a</i> | DirOKir           | N340-N530    | 5        | 72.1      | -60.4     | 2.2        |
| <i>ZF4b</i> | Dir Kir           | N340-N530    | 5        | 68.9      | -58.1     | 4.5        |
| <i>ZF5a</i> | Dir Kir           | N250-N340    | 4        | 254       | -79.3     | 3.9        |
| <i>ZF5b</i> | Dir Kir           | N400-N590    | 6        | 33.4      | -81.3     | 3          |
| <i>ZF6</i>  | Dir Kir           | N250-N530    | 8        | 257.6     | -58.9     | 4.4        |
| <i>ZF6a</i> | Dir Kir           | N20-N310     | 4        | 262.2     | -47.2     | 1.8        |
| <i>ZF6b</i> | Dir Kir           | N340-N530    | 5        | 273.9     | -60.3     | 8          |
| <i>ZF7</i>  | Dir Kir           | N250-N310    | 3        | 240.5     | -85.7     | 3.8        |
| <i>ZF7a</i> | Dir Kir           | N20-N310     | 4        | 312.8     | -85.9     | 2.3        |
| <i>ZF8</i>  | Dir Kir           | N200-N590    | 11       | 241.3     | -78.7     | 5.5        |
| <i>ZF9</i>  | Dir Kir           | N250-N310    | 3        | 76.1      | -50.1     | 2.2        |
| <i>ZF9a</i> | Dir Kir           | N20-N310     | 4        | 63.8      | -54.7     | 2.3        |
| <i>ZF9b</i> | Dir Kir           | N340-N530    | 5        | 90.6      | -54.5     | 6.7        |
| <i>ZF9b</i> | DirOKir           | N340-N530    | 5        | 96        | -54.1     | 4.4        |
| <i>ZG1</i>  | Dir Kir           | N250-N450    | 6        | 146.7     | -59.8     | 7.8        |
| <i>ZG2</i>  | Dir Kir           | N250-N280    | 2        | 112.8     | -67.2     | 0.1        |
| <i>ZG2</i>  | Dir Kir           | N250-N450    | 6        | 121.5     | -47.1     | 4.2        |
| <i>ZG2b</i> | DirOKir           | N250-N450    | 6        | 129.5     | -48.7     | 2.7        |
| <i>ZG3</i>  | Dir Kir           | N250-N530    | 8        | 180.7     | -48.2     | 3.9        |
| <i>ZG3b</i> | DirOKir           | N250-N530    | 8        | 178.2     | -52.6     | 2.4        |
| <i>ZG4</i>  | Dir Kir           | N160-N560    | 10       | 70.8      | 34.6      | 12.5       |
| <i>ZG5</i>  | Dir Kir           | N160-N560    | 6        | 90.3      | 6.6       | 8.2        |

Table S4. Summary of all used ChRM directions and associated statistical analysis from Spid pluton.

| Site | Rock type | Lat (°N) | Long (°E) | N  | n  | D (°) | I (°) | $\alpha_{95}$ | k     |
|------|-----------|----------|-----------|----|----|-------|-------|---------------|-------|
| SA   | Diorite   | 437458   | 3837582   | 2  | 2  | 239.2 | -58.2 | 17.5          | 206.4 |
| SB   | Diorite   | 437213   | 3837889   | 23 | 21 | 68.1  | 49.7  | 18.3          | 3.7   |
| SC   | Diorite   | 437287   | 3837873   | 12 | 10 | 12.4  | 44.1  | 23.2          | 4.5   |
| SD   | Diorite   | 437370   | 3837843   | 6  | 6  | 6.6   | -81.2 | 16.7          | 17    |
| SE   | Diorite   | 437365   | 3837886   | 3  | 3  | 131.5 | -76.7 | 20.8          | 36.1  |
| SF   | Diorite   | 437414   | 3837814   | 4  | 4  | 228.4 | 68    | 74.5          | 2.5   |
| SG   | Diorite   | 437457   | 3837769   | 8  | 8  | 335.1 | 73.4  | 29.5          | 4.5   |
| Mean |           |          |           | 58 |    | 41.3  | 67.7  | 11.8          | 3.5   |

Note: Lat (°N) and Long (°E) are site latitude and site longitude respectively; N and n is number of specimens analyzed from a site and number of specimens considered for final calculations; D (°) and I (°) are the mean remanence declination and mean remanence inclination;  $\alpha_{95}$  = 95% confidence circle on mean remanence; k is the Fisher (1953) precision parameter; MAD is the maximum angular deviation.

Table S5. Petrophysical data of the special core analyses 50 for the studied intrusions in Tafresh.

| Sample | Rock type | $m_d(g)$ | $h(mm)$ | $\phi_i(mm)$ | $\rho_b(g/cm^3)$ | Km       | $W_s$ | $W_w$ | $\Phi_w(\%)$ | $\Phi_{gas}(\%)$ | $\rho_g$ |
|--------|-----------|----------|---------|--------------|------------------|----------|-------|-------|--------------|------------------|----------|
| S11A4  | Diorite   | 23.13    | 21      | 22.6         | 2.75             | 29588.44 | 23.16 | 0.03  | 0.36         |                  | 2.76     |
| S13B3  | Diorite   | 22.96    | 21      | 22.8         | 2.68             | 6928.39  | 23.00 | 0.04  | 0.47         |                  | 2.69     |
| S13B4  | Diorite   | 23.5     | 21.2    | 22.7         | 2.74             | 8980.11  | 23.58 | 0.08  | 0.93         |                  | 2.77     |
| S14A3  | Diorite   | 22.59    | 21.1    | 22.6         | 2.67             | 155.72   | 22.83 | 0.24  | 2.84         |                  | 2.75     |
| S14A4  | Diorite   | 22.3     | 20.9    | 22.6         | 2.66             | 138.26   | 22.50 | 0.20  | 2.39         | 2.65             | 2.73     |
| S15A3  | Diorite   | 23.4     | 21.1    | 22.8         | 2.72             | 27509.96 | 23.42 | 0.02  | 0.23         |                  | 2.72     |
| S15A4  | Diorite   | 23.33    | 21.1    | 22.8         | 2.71             | 30266.16 | 23.36 | 0.03  | 0.35         |                  | 2.72     |
| S15B3  | Diorite   | 23.45    | 21.1    | 22.6         | 2.77             | 30098.45 | 23.48 | 0.03  | 0.35         |                  | 2.78     |
| S15B4  | Diorite   | 22.83    | 20.4    | 22.5         | 2.82             | 32733.65 | 22.86 | 0.03  | 0.37         |                  | 2.83     |
| S16A3  | Diorite   | 22.94    | 21.1    | 22.5         | 2.74             | 21760.70 | 23.00 | 0.06  | 0.72         |                  | 2.76     |
| S16A4  | Diorite   | 23.15    | 21.2    | 22.7         | 2.70             | 19969.09 | 23.22 | 0.07  | 0.82         |                  | 2.72     |
| S16B3  | Diorite   | 22.99    | 21.6    | 22.5         | 2.68             | 26487.38 | 23.02 | 0.03  | 0.35         |                  | 2.69     |
| S16B4  | Diorite   | 23.13    | 21.3    | 22.7         | 2.68             | 27331.63 | 23.17 | 0.04  | 0.46         |                  | 2.70     |
| S17A3  | Diorite   | 21.73    | 21.2    | 22.7         | 2.53             | 238.85   | 22.39 | 0.66  | 7.70         | 8.68             | 2.75     |
| S18A2  | Diorite   | 21.97    | 21.4    | 22.7         | 2.54             | 7881.18  | 22.30 | 0.33  | 3.81         |                  | 2.64     |
| S18A3  | Diorite   | 22.05    | 21.2    | 22.7         | 2.57             | 8414.22  | 22.39 | 0.34  | 3.96         |                  | 2.68     |
| S18B2  | Diorite   | 21.99    | 21.2    | 22.5         | 2.61             | 9399.89  | 22.30 | 0.31  | 3.68         |                  | 2.71     |
| S18B3  | Diorite   | 22.2     | 21.3    | 22.5         | 2.62             | 9853.18  | 22.50 | 0.30  | 3.54         | 6.46             | 2.72     |
| S19B5  | Diorite   | 20.58    | 19.5    | 22.7         | 2.61             | 7139.93  | 20.68 | 0.10  | 1.24         | 3.81             | 2.64     |

|               |         |       |      |      |      |          |       |      |      |       |      |
|---------------|---------|-------|------|------|------|----------|-------|------|------|-------|------|
| <i>S1B4</i>   | Diorite | 22.09 | 20.1 | 22.7 | 2.72 | 2938.65  | 22.21 | 0.12 | 1.48 |       | 2.76 |
| <i>S20A3</i>  | Diorite | 22.69 | 21.1 | 22.6 | 2.68 | 12217.58 | 22.78 | 0.09 | 1.08 | -0.31 | 2.71 |
| <i>S3B3</i>   | Diorite | 23.51 | 21.3 | 22.8 | 2.70 | 4128.98  | 23.54 | 0.03 | 0.35 | 0.84  | 2.71 |
| <i>S3B4</i>   | Diorite | 21.22 | 19.6 | 22.7 | 2.68 | 1950.83  | 21.26 | 0.04 | 0.50 |       | 2.69 |
| <i>S4A3</i>   | Diorite | 23.23 | 21.1 | 22.7 | 2.72 | 14399.92 | 23.31 | 0.08 | 0.94 |       | 2.75 |
| <i>S4A4</i>   | Diorite | 22.96 | 21.1 | 22.7 | 2.69 | 13732.91 | 23.02 | 0.06 | 0.73 | 0.14  | 2.71 |
| <i>S5B3</i>   | Diorite | 23.49 | 21.2 | 22.9 | 2.69 | 7495.64  | 23.54 | 0.05 | 0.53 | 2.65  | 2.71 |
| <i>S6A3</i>   | Diorite | 23.44 | 21.4 | 22.7 | 2.71 | 20625.32 | 23.46 | 0.02 | 0.23 |       | 2.71 |
| <i>S6A4</i>   | Diorite | 23.49 | 21.4 | 22.5 | 2.76 | 21142.45 | 23.51 | 0.02 | 0.24 | 0.15  | 2.77 |
| <i>S6B4</i>   | Diorite | 22.36 | 20.6 | 22.7 | 2.68 | 25221.40 | 22.38 | 0.02 | 0.24 |       | 2.69 |
| <i>S7A4</i>   | Diorite | 23.31 | 21.1 | 22.6 | 2.76 | 25395.60 | 23.35 | 0.04 | 0.47 |       | 2.77 |
| <i>S7B3</i>   | Diorite | 23.06 | 21.1 | 22.6 | 2.73 | 11202.62 | 23.10 | 0.04 | 0.47 |       | 2.74 |
| <i>S7B4</i>   | Diorite | 22.96 | 21.1 | 22.7 | 2.69 | 13405.60 | 22.99 | 0.03 | 0.35 |       | 2.70 |
| <i>S8B3</i>   | Diorite | 23.27 | 21.4 | 22.5 | 2.74 | 17945.48 | 23.34 | 0.07 | 0.82 |       | 2.76 |
| <i>S9A2</i>   | Diorite | 22.52 | 21.1 | 22.4 | 2.71 | 28389.80 | 22.58 | 0.06 | 0.70 | -0.14 | 2.73 |
| <i>SE2-3</i>  | Diorite | 27.2  | 21.3 | 24.6 | 2.69 | 222.44   | 27.40 | 0.20 | 1.94 | 4.90  | 2.74 |
| <i>SF1-2</i>  | Diorite | 24.88 | 18.8 | 24.5 | 2.81 | 398.30   | 25.01 | 0.13 | 1.47 |       | 2.85 |
| <i>SF2-3</i>  | Diorite | 27.17 | 21.1 | 24.6 | 2.71 | 565.25   | 27.41 | 0.23 | 2.34 | 6.18  | 2.78 |
| <i>SG4-3</i>  | Diorite | 27.44 | 21.2 | 24.7 | 2.70 |          | 27.60 | 0.16 | 1.54 | 2.17  | 2.74 |
| <i>SN17A4</i> |         | 22    | 21.1 | 22.5 | 2.62 | 264.63   |       |      | 0.00 |       | 2.62 |

$m_d$  (dry weight);  $h$  (height of core),  $\phi$  (diameter of core);  $\rho_b$  (bulk density);  $K_m$  (magnetic susceptibility);  $W_s$  (saturation weight);  $W_w$  (water weight);  $\Phi_w$  (measured porosity using water),  $\Phi_{gas}$  (measured porosity using helium) and  $\rho_g$  (grain density).

Table S5. Continued.

| <i>Sample</i> | <i>Rock type</i> | <i>m<sub>d</sub>(g)</i> | <i>h (mm)</i> | <i>phi (mm)</i> | <i>ρ<sub>b</sub> (g/cm<sup>3</sup>)</i> | <i>K<sub>m</sub></i> | <i>W<sub>s</sub></i> | <i>W<sub>w</sub></i> | <i>Φ<sub>w</sub>(%)</i> | <i>Φ<sub>gas</sub>(%)</i> | <i>ρ<sub>g</sub></i> |
|---------------|------------------|-------------------------|---------------|-----------------|-----------------------------------------|----------------------|----------------------|----------------------|-------------------------|---------------------------|----------------------|
| <i>ZD1-3</i>  | Granite          | 23.03                   | 21.8          | 23.9            | 2.36                                    | 221.11               | 23.38                | 0.35                 | 3.57                    | 12.90                     | 2.44                 |
| <i>ZD3-4</i>  | Granite          | 24.16                   | 21.2          | 23.8            | 2.56                                    | 449.88               | 24.36                | 0.20                 | 2.12                    |                           | 2.62                 |
| <i>ZD4-2</i>  | Granite          | 22.5                    | 20            | 23.8            | 2.53                                    | 1065.60              | 22.79                | 0.29                 | 3.26                    |                           | 2.62                 |
| <i>ZD9-2</i>  | Granite          | 24.28                   | 21.1          | 23.9            | 2.57                                    | 321.07               | 24.53                | 0.25                 | 2.62                    | 3.81                      | 2.64                 |
| <i>ZE1-3</i>  | Mafic dyke       | 24.52                   | 21.8          | 23.8            | 2.53                                    | 186.19               | 24.80                | 0.28                 | 2.89                    |                           | 2.60                 |
| <i>ZE1-4</i>  | Mafic dyke       | 23.8                    | 20.9          | 23.9            | 2.54                                    | 186.19               | 24.04                | 0.24                 | 2.60                    | 5.18                      | 2.61                 |
| <i>ZE2-3</i>  | Mafic dyke       | 24.182                  | 21.7          | 23.6            | 2.55                                    | 135.56               | 24.28                | 0.10                 | 1.03                    |                           | 2.58                 |
| <i>ZE3-2</i>  | Mafic dyke       | 24.69                   | 21.5          | 24              | 2.54                                    | 123.99               | 24.74                | 0.05                 | 0.51                    |                           | 2.55                 |
| <i>ZE4-4</i>  | Mafic dyke       | 24.38                   | 22.4          | 23.8            | 2.45                                    | 136.52               | 24.68                | 0.30                 | 3.01                    |                           | 2.52                 |
| <i>ZE6-3</i>  | Mafic dyke       | 24.56                   | 21.2          | 23.9            | 2.58                                    |                      | 24.74                | 0.18                 | 1.85                    | 3.93                      | 2.63                 |
